# Supplementary material for: CTAB-assisted synthesis of novel ultrathin MoSe2nanosheets perpendicular to graphene for the adsorption and photodegradation of organic dyes under visible light
Source: Royal Society of Chemistry journal article supplement (doi:10.1039/c5nr05748e), 2015-11-19
Supplement: c5nr05748e1.pdf [file c5nr05748e1.pdf]

*Support information*

**CTAB-assisted synthesis of ultrathin MoSe<sub>2</sub> nanosheets perpendicular to graphene for adsorption and photodegradation of organic dyes under visible light**

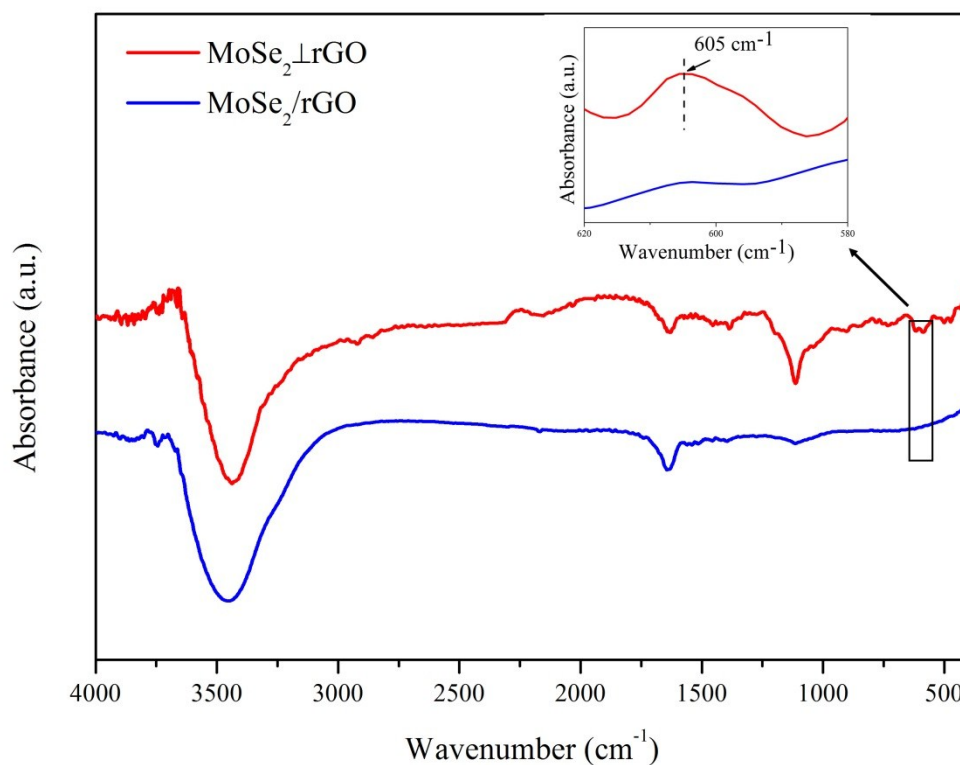

**Fig. S1** FT-IR spectra of MoSe<sub>2</sub>/rGO composites and MoSe<sub>2</sub>⊥rGo heterostructures.

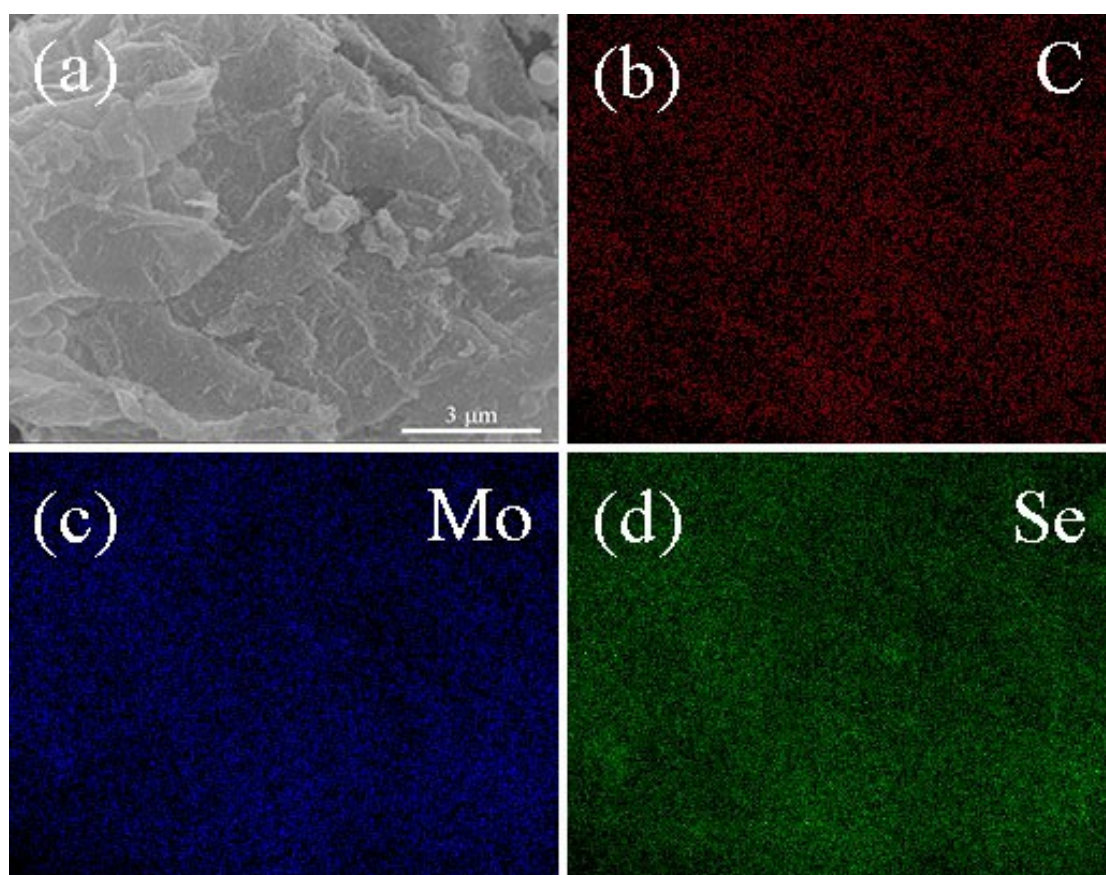

**Fig. S2** A typical elemental mapping under SEM of MoSe<sub>2</sub>/LrGO heterostructure.

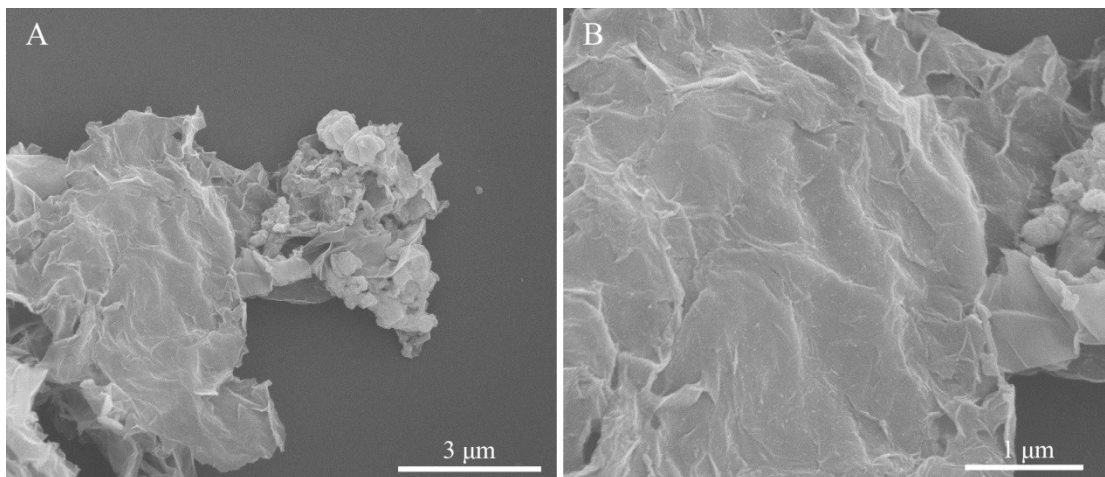

**Fig. S3** SEM images of the sample with CTAB but in the absence of stirring.

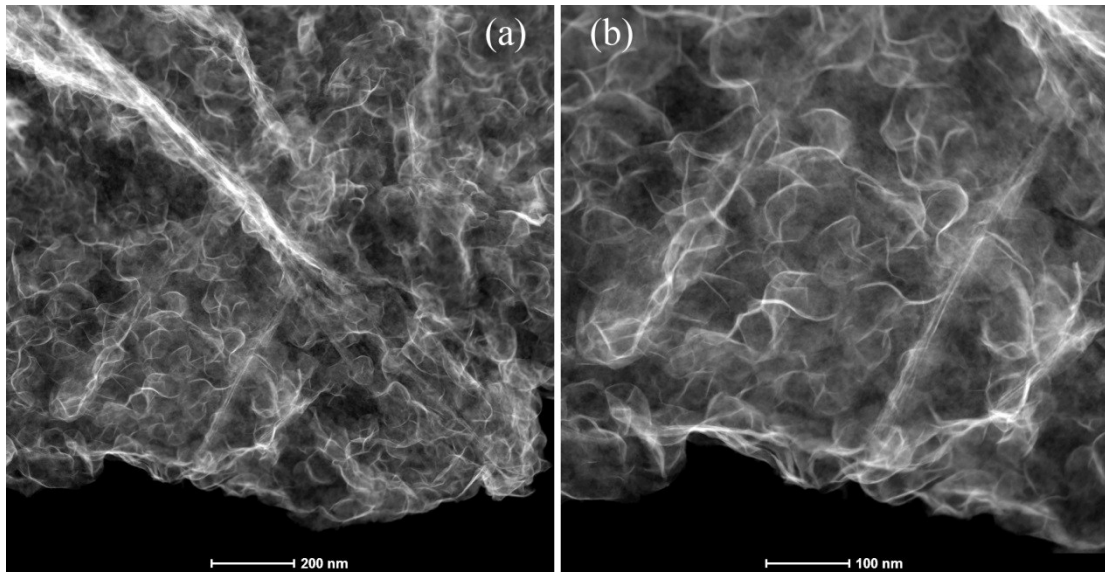

**Fig. S4** STEM images of  $\text{MoSe}_2 \perp \text{rGO}$  heterostructure with different magnifications.

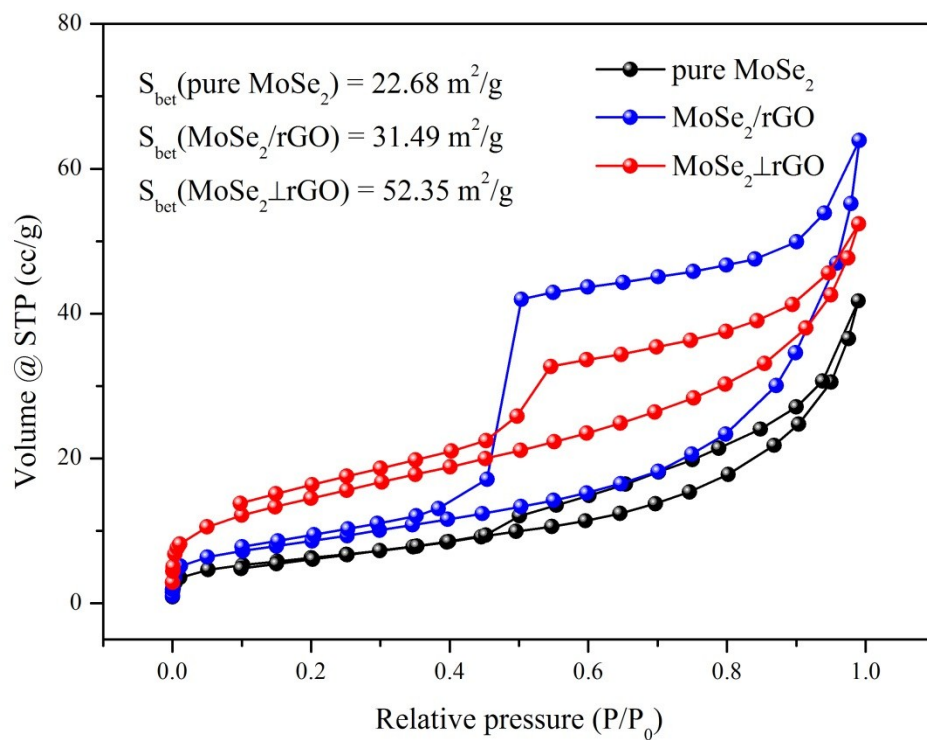

**Fig. S5** The N<sub>2</sub> adsorption-desorption isotherms of pure MoSe<sub>2</sub>, MoSe<sub>2</sub>/rGO composites and MoSe<sub>2</sub>⊥rGO heterostructure.

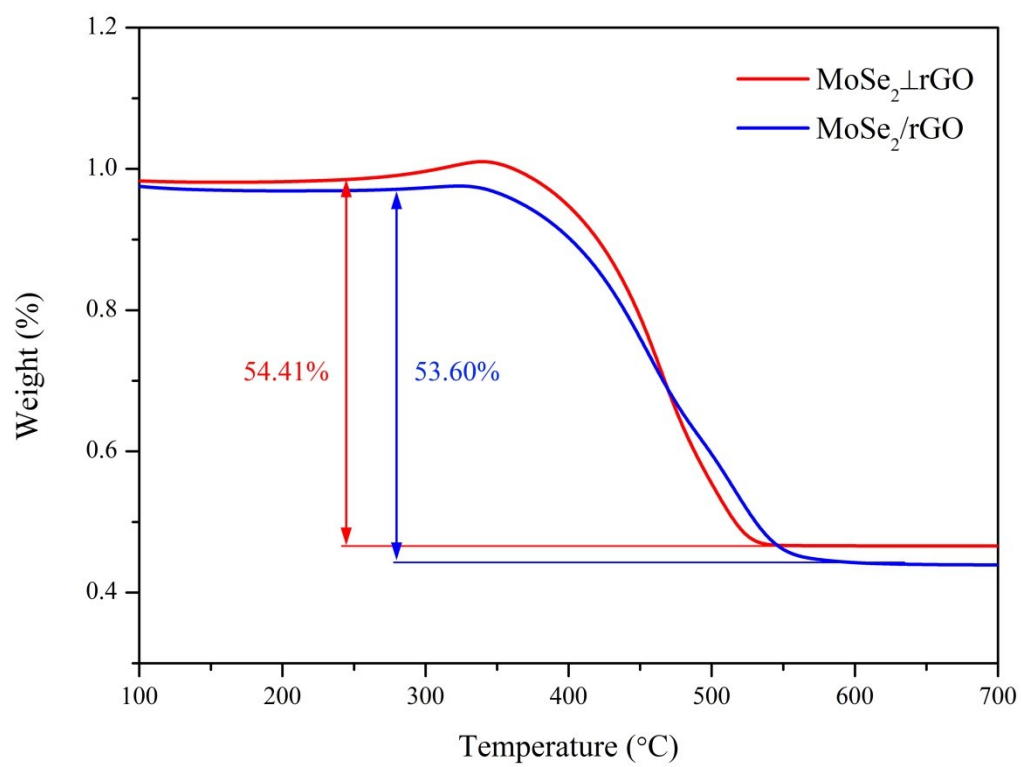

**Fig. S6** TG curves of MoSe<sub>2</sub>/rGO composites and MoSe<sub>2</sub>-LrGO heterostructure.

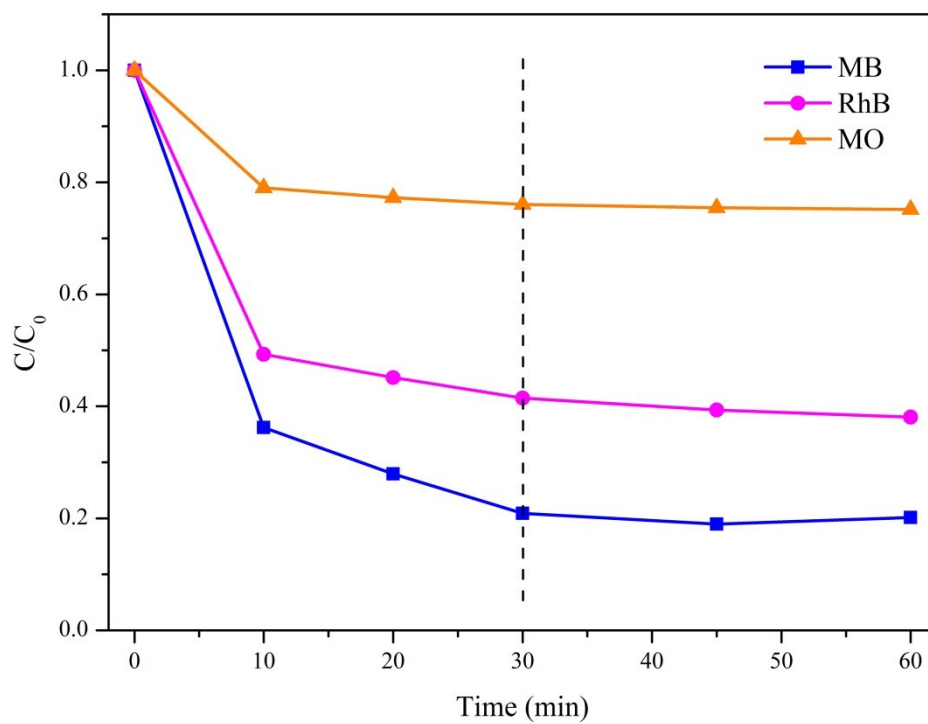

**Fig. S7** Adsorption spectra of three organic dyes in darkness with MoSe<sub>2</sub>/LrGO heterostructure.
